# Supplementary material for: A retrospective multicenter study on clinical and serological parameters in patients with MuSK myasthenia gravis with and without general immunosuppression
Source: Front Immunol. 2024 Apr 23;15:1325171. doi: 10.3389/fimmu.2024.1325171 (PMC11074957; doi:10.3389/fimmu.2024.1325171)
Supplement: Supplementary file 2 [file Table_1.xlsx]

## Sheet: Tabelle1
Country of origin	Patient	Sex	Age at sample, years	Age of onset, years	Disease duration (Age at sample- Age of onset), years	MGFA at onset	MGFA at sample (Remission indicated as 0)	Immunosuppression at sample (blood sample taken prior to IVIG injection, where applicable)	Symptoms at onset	Symptoms at sample	MuSK titre at onset (nM) measured by RIA (single dilution) at local diagnostic centres	MuSK titre at time of sample (nM) measured by RIA (single dilution) at local diagnostic centres	MuSK antibody titre at sample (nM), measured by RIA (serial dilution) at Oxford Neuroimmunology group	Notes/Associated diseases
Italy	M085	F	30	30	<1	IIIB	IIIB	No IS	speach and swalloring difficulties, then diplopia and ptosis	ptosis, diplopia, dysarthria, pharyingeal muscles weakness and mild neck muscles weakness	1.68	1.68	12.72	thyroid disease (toxic goiter)
Italy	M164	F	16	16	<1	IIB	IIIB	No IS	diplopia, then ptosis and orophariyngeal symtpoms	mild diplopia, severe pharyngeal muscle weakness	1.3	1.3	17.06
Italy	M167	F	50	46	4	2IIB	IIIB	No IS	dysarthria, then dysphagia and diplopia, then ptosis and neck muscles weakness	diplopia, mild ptosis, pharyngeal muscles weakness, tongue and neck muscles weakness	0.93	1.8	9.45	hypertyroidism, orticaria
Italy	M181	F	60	60	4	IIIB	IIIB	No IS	diplopia and dysphagia	diplopia, ptosis, severe pharyngeal muscles weakness	1.56	0.05	4.37
Italy	M182	F	59	59	10	IIA	0	No IS	diplopia, neck weakness	no symptoms	0.06	0.07	0.06	Multiple Sclerosis (RIS?), *positive for MuSK IgG4 in MuSK cell-based assay
Italy	Rome 1	F	63	63	0	N/A	IIIB	No IS	N/A	facial, bulbar and neck extensor muscle weakness	N/A	N/A
The Netherlands	Maastricht 1	F	48	49	<1	N/A	IIIB	No IS	N/A	Dysphagia, dysarthria, diplopia	N/A	5.1		Pulmonary embolism, gastric bypass
Belgium	Leuven 2	F	50	N/A	N/A	IIB	IVB	No IS	Dysarthria	Generalized weakness	N/A	4.9
Greece	G1* (before treatment)	M	79	79	0	IIIB	0	No IS	N/A	N/A	27	27	N/A
Greece	G2* (before treatment)	F	17	17	<1	IIB	0	No IS	N/A	N/A	11	11	N/A
Greece	G3* (before treatment)	F	45	45	<1	I	I	No IS	N/A	N/A	0.045	0.045	N/A
Greece	G4* (before treatment)	F	47	47	<1	IVB	IIIB	No IS	N/A	N/A	N/A	N/A	N/A
Greece	G5* (before treatment)	F	49	49	<1	V	IIB	No IS	N/A	N/A	13	13	N/A
The Netherlands	Maastricht 3	F	46	20	26	IIIB	0	Prednisone, Azathioprine, plasmapheresis	bulbar symptoms and weakness in arms, not in legs	none				none
The Netherlands	Maastricht 4	F	17	17	0	V	V	Prednisone, Plasmapheresis	Dysarthria, respiratory crisis, neck muscle weakness	Dysarthria, respiratory crisis, neck muscle weakness	N/A	6.6		none
Italy	M083	F	40	19	21	IIB	IIB	Prednisone	diplopia, ptosis, limb muscles weakness then mild dysphagia)	mild dysphagia	0.08	0.08	6.88
Italy	M087	M	64	61	3	IVB	I	Prednisone	diplopia, ptosis, then severe dysphagia and respiratory crisis	ptosis	1.28	1.28	0.63	mellitus diabetes, psoriasis
Italy	M089	F	73	59	14	IIIB	IIIB	Cyclosporine,Prednisone, IVIG every month	diplopia, ptosis, dysphagia and respiratory difficulties, limb muscles weakness	mild facial muscles weakness, diplopia, severe pharyngeal and limb muscles weakness, dysphagia	2.1	0.54	12.72	TBC
Italy	M091	F	65	58	7	IIB	IIB	Methylprednisolone	limb and neck muscles weakness, ptosis, then mild dysphagia and mild respiratory weakness	mild diplopia and ptosis, mild pharyngeal muscles weakness	1.99	0.0	8.8	Kaposi's sarcoma
Italy	M092	F	50	28	22	V	I	Prednisone	dysarthria, respiratory involvement, dysphagia, ptosis, limb muscles weakness	severe diplopia	3.1	0.7	0.41
Italy	M093	F	68	63	5	IVB	IIIB	Prednisone	diplopia, then dysarthria, dysphagia, neck muscles weakness,ptosis and severe respiratory difficulties	mild ptosis and respiratory difficulties	16.8	2.5	10.08	nodulo tiroideo
Italy	M097	F	28	24	4	IIB	I	Prednisone, Azathioprine	ptosis, then orofaringeal symptoms	severe diplopia	1.64	1.64	12.73	eczema
Italy	M102	F	57	45	12	IIIB	IIB	Prednisone, IVIG every month	ptosis, diplopia, dysarthria, dysphagia	mild dysarthria, mild pharyngeal muscles weakness	1.7	N/A	18
Italy	M108	F	50	43	7	IIB	0	Prednisone, IVIG every 3 months	dysarthria, dysphagia	no symptoms	2.3	2.3	7.76
Italy	M112	F	31	16	15	IIIB	0	Prednisone	limb muscles weakness, diplopia, dysphagia, ptosis	no symptoms	1.67	N/A	4.62
Italy	M116	F	40	32	8	IIIB	0	Prednisone	mild dysphagia, then dysarthria and limb muscles weakness	no symptoms	1.51	0.1	9.65
Italy	M119	F	65	35	30	IIIB	IIB	Prednisone	diplopia, dysarthria, tongue muscle weakness, neck muscles weakness, mild pharyngeal muscles weakness	dysarthria	0.37	0.37	1.64
Italy	M122	F	53	40	13	IIIB	IIB	Prednisone	diplopia, then dysphagia	mild dysphagia and pharyngeal muscles weakness	1.36	0.0	9.25
Italy	M123	M	59	44	15	IIIB	0	Prednisone, IVIG every 70 days	dysphagia, dysarthria, diplopia	no symptoms	1.58	0.16	7.97
Italy	M125	F	52	36	16	V	IIB	Prednisone	severe dysphagia, diplopia, limb weakness muscles then intubation	pharyngeal muscles weakness	1.78	0.02	3.84
Italy	M128	F	59	50	9	IVB	0	Prednisone	diplopia, limb muscles weakness, respiratory weakness, dysphonia, neck muscle weakness	no symptoms	1.4	0.0	17.47	grandparents first cousins, a cousin affected by Myasthenia
Italy	M129	M	44	37	7	IIB	I	Prednisone	ptosis, diplopia, then mild pharyngeal muscles weakness	ptosis and diplopia	1.1	1.1	4.15	grandparents first cousins
Italy	M132	F	52	18	34	IIIB	IIA	Prednisone, Cyclosporine, IVIG every month	diplopia, mild dysartria, episodic dysphagia, limb and neck muscles weakness	limb muscles weakness	1.8	0.49	13.58
Italy	M136	F	60	52	8	IIIB	IIB	Prednisone	diplopia, mild ptosis, dysarthria, neck muscles weakness	mild pharyngeal muscles weakness	0.27	0.27	0.01	*positive for MuSK IgG in MuSK cell-based assay
Italy	M150	F	49	19	30	IIIB	0	Prednisone	diplopia, dysphagia, upper limbs weakness	no symptoms	0.13	0.13	3.62
Italy	M165	F	59	49	10	V	IIB	Prednisone, Azathioprine	intubated, dysphagia	mild pharyngeal muscles weakness	1.19	1.19	5.27
Italy	M166	F	33	29	4	IIB	0	Prednisone	diplopia, ptosis, then muscles neck weakness, bite difficulties	no symptoms	1.53	1.53	2.75
Italy	M170	F	43	38	5	IVB	IIB	Prednisone	dysphonia and dysphagia, then ptosi and diplopia	moderate pharyngeal muscles weakness	2	1.2	3.92
Italy	M173	F	46	42	4	IIIB	IIB	Prednisone	diplopia, neck and limb muscles weakness , then dysphagia	pharyngeal muscles weakness	1.67	1.13	8.57
Italy	M175	F	67	44	23	IIIB	IIA	Prednisone	diplopia, then dysarthria and dysphagia	mild ptosis, mild pharyngeal muscles weakness	1	1	4.86	thyroiditis
Italy	M176	F	22	18	4	IIIB	0	Prednisone, plasmapheresis	ptosis, dysarthria, neck muscle weakness, neck and limb muscles weakness, dysphagia	no symptoms	1.75	0.57	4.69
Italy	M180	F	55	47	8	IIIB	IIB	Prednisone, Azathioprine	dysarthria,neck muscles weakness, pharyngeal muscles weakness	dysarthria, dysphagia	1.88	0.13	12.72	Hashimoto disease
Italy	M183	F	60	56	4	IIB	IIA	Dexamethasone	ptosis, diplopia then dysphagia	mild limb muscles weakness	1.66	0.38	11.72	sister affected by MG
Italy	M200	F	46	43	3	IIIB	IIB	Prednisone, Azathioprine	diplopia, mild dysartria, episodic dysphagia, limb and neck muscles weakness	diplopia, rinolalia, dysphagia	1.23	1.23	N/A	thyroid carcinoma
Italy	M201	F	65	39	26	IIB	I	Prednisone	diplopia, than neck muscles weakness and dysphagia	mild diplopia	0	0.0	N/A
Italy	M202	F	48	46	2	IVB	IIIB	Prednisone, Azathioprine	diplopia, ptosis, dysphagia and respiratory difficulties, limb muscles weakness	ptosis, mild respiratory difficulties	0.12	0.2	N/A
Italy	M203	F	20	10	10	IIB	IIB	Prednisone	diplopia then dysphagia and dysarthria	mild pharyngeal muscles weakness	1.49	1.2	N/A
Italy	M204	M	36	32	4	IIIB	0	Prednisone	ptosis, diplopia, dysphagia, limb and neck muscles weakness then respiratory difficulties	no symptoms	1.00	1.00	N/A	epilepsy
Italy	M205	F	38	34	4	IVB	IIIB	Prednisone, Azathioprine	respiratory weakness, diplopia, limb muscles weakness	diplopia, limb muscles weakness, ptosis, dysphagia	1.05	1.05	N/A	Hashimoto tyroiditis
Italy	M206	M	40	22	18	IIB	0	Prednisone	diplopia, disphagia, limb and neck muscles weakness	no symptoms	1.22	1.22	N/A
Italy	M207	F	43	40	3	IIB	IIB	Prednisone, Azathioprine	diplopia, limb and pharyngeal muscles weakness	diplopia, neck and pharyngeal muscles weakness	1.05	1.05	N/A
Belgium	Leuven 1	M	36	N/A		I	IIA	Azathioprine	Ocular	Generalized weakness	N/A	11.3	N/A
Greece	G1* (after treatment)	M	83	79	4.5	N/A	N/A	Prednisone	N/A	N/A	27	21	N/A
Greece	G2* (after treatment)	F	23	17	5	N/A	N/A	Prednisone	N/A	N/A	11	5.5	N/A
Greece	G3* (after treatment)	F	45	45	0.5	N/A	N/A	Prednisone	N/A	N/A	0.045	0.1	N/A
Greece	G4* (after treatment)	F	50	47	3	N/A	N/A	Prednisone, cyclosporine	N/A	N/A	N/A	1.8	N/A
Greece	G5* (after treatment)	F	51	49	2	N/A	N/A	Prednisone, Mycophenolate mofetil	N/A	N/A	13	4.5	N/A
Italy	M01	F	51	27	24	N/A	IIB	No IS, Thymectomy
Italy	M02	F	80	81	-1	N/A	IIB	No IS
Italy	M06	M	57	57	0	N/A	I	No IS
Italy	M07	F	55	40	15	N/A	IIB	No IS
Italy	M10	F	62	62	0	N/A	IVB	No IS
Italy	M13	F	77	77	0	N/A	V	No IS
Italy	M14	M	67	64	3	N/A	IIA	No IS
Italy	M17	M	68	67	1	N/A	IIA	No IS
Italy	M20	F	35	28	7	N/A	IIB	No IS, Thymectomy
Italy	M21	F	46	44	2	N/A	IIA	No IS
Italy	M22	M	79	78	1	N/A	IVB	No IS
Italy	M31	M	73	73	0	N/A	IIA	No IS
Italy	M35	F	39	29	10	N/A	IIB	No IS
Italy	M40	F	47	30	17	N/A	V	No IS
Italy	M41	M	68	67	1	N/A	IIB	No IS
Italy	M03	M	60	59	1	N/A	IIIB	Prednisone
Italy	M04	M	69	69	0	N/A	IIA	Prednisone, Azathioprine
Italy	M05	F	16	15	1	N/A	V	Prednisone
Italy	M09	M	63	62	1	N/A	IIIB	Prednisone
Italy	M08	F	76	76	0	N/A	IIB	Prednisone
Italy	M11	M	76	75	1	N/A	I	Prednisone
Italy	M12	M	70	68	2	N/A	IIIB	Prednisone, Azathioprine
Italy	M15	M	78	77	1	N/A	I	Prednisone, Azathioprine
Italy	M16	M	69	68	1	N/A	IIA	Prednisone
Italy	M18	F	35	33	2	N/A	IIB	Prednisone, Thymectomy
Italy	M19	F	47	17	30	N/A	IIB	Prednisone , Aza, IVIG , Thymectomy
Italy	M23	F	23	22	1	N/A	IIA	Prednisone, Thymectomy
Italy	M24	F	48	45	3	N/A	IIB	Prednisone
Italy	M25	F	32	32	0	N/A	IIIB	Prednisone , Thymectomy
Italy	M26	M	53	51	2	N/A	V	Prednisone, mycophenolate mofetil, IVIG
Italy	M27	M	77	66	11	N/A	IIIB	Prednisone, Azathioprine
Italy	M28	F	63	43	20	N/A	IIIB	Prednisone , AZA, Thymectomy
Italy	M29	M	69	69	0	N/A	IIA	Methylprednisolone
Italy	M30	F	32	31	1	N/A	IVB	Prednisone, Azathioprine
Italy	M32	F	79	78	1	N/A	IIIB	P-E, AZA
Italy	M33	F	82	82	0	N/A	IIA	Prednisone
Italy	M34	M	50	50	0	N/A	IIB	Prednisone
Italy	M36	M	70	42	28	N/A	IIIB	Prednisone
Italy	M37	M	51	50	1	N/A	IIB	Prednisone
Italy	M38	F	72	70	2	N/A	IIIB	Prednisone
Italy	M39	M	73	72	1	N/A	I	Prednisone
Italy	M42	M	74	74	0	N/A	I	Prednisone
Italy	M43	F	2	1	1	N/A	IIA	Prednisone
	Healthy controls
	A1	F	39
	A2	M	59
	A3	M	54
	A4	F	40
	A7	F	57
	A9	F	50
	B1	F	30
	B3	F	35
	B4	F	55
	B6	M	40
	B7	F	24
	B8	F	58
	B9	F	61
	C2	F	30
	C7	F	23
	C8	M	35
	D3	F	52
	D4	F	43
	D5	F	64
	D6	F	20
	D8	F	59
	E1	F	30
	E4	F	57
	E5	F	42
	E6	M	56
	E7	F	42
	E8	F	39
	E9	F	64
	F1	F	20
	F5	F	64
	F6	F	57
	F7	F	65
	F8	F	58
	F9	F	35
	G7	F	62
	H1	F	59
	H3	F	35
	H8	F	68
	H9	F	63
	I1	M	39
	I4	F	50
	I7	F	60
	I8	M	51
	I9	M	59
	HCE	F	N/A
	HCF	F	N/A
